# Supplementary material for: Influence of Y3+, Gd3+, and Lu3+ co-doping on the phase and luminescence properties of monoclinic Eu:LaVO4 particles
Source: Royal Society of Chemistry journal article supplement (doi:10.1039/c5dt03147h), 2015-01-01
Supplement: c5dt03147h1.pdf [file c5dt03147h1.pdf]

# **Influence of Y<sup>3+</sup>, Gd<sup>3+</sup>, and Lu<sup>3+</sup> co-doping on the phase and luminescence properties of monoclinic Eu:LaVO<sub>4</sub> particles**

Rik Van Deun,<sup>a,\*</sup> Micheline D'hooge,<sup>a</sup> Aleksandar Savic,<sup>a,b,c</sup> Isabel Van Driessche,<sup>d</sup>  
Kristof Van Hecke,<sup>b</sup> Anna M. Kaczmarek<sup>a,\*</sup>

<sup>a</sup> *L<sup>3</sup>, Luminescent Lanthanide Lab, Department of Inorganic and Physical Chemistry, Ghent University, Krijgslaan 281-S3, B-9000 Ghent, Belgium; corresponding email: [anna.kaczmarek@ugent.be](mailto:anna.kaczmarek@ugent.be), [rik.vandeun@ugent.be](mailto:rik.vandeun@ugent.be)*

<sup>b</sup> *XStruct, Department of Inorganic and Physical Chemistry, Ghent University, Krijgslaan 281-S3, B-9000 Ghent, Belgium.*

<sup>c</sup> *Faculty of Chemistry, University of Belgrade, Studentski trg 12-16, 11000 Belgrade, Serbia.*

<sup>d</sup> *SCRiPTS, Department of Inorganic and Physical Chemistry, Ghent University, Krijgslaan 281-S3, B-9000 Ghent, Belgium.*

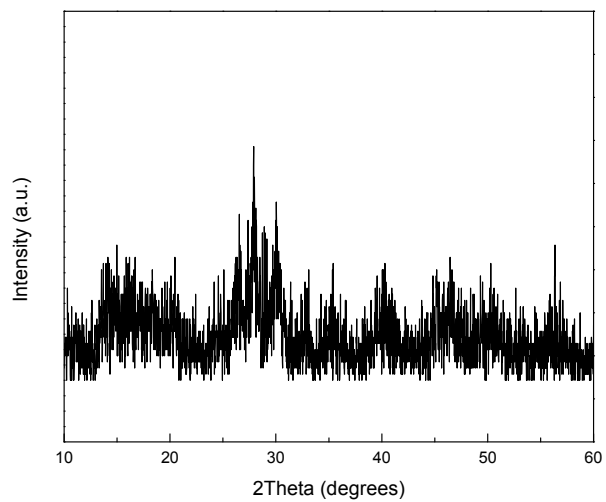

**Fig. S1** XRD pattern of sample prepared for 15 minutes using 30 mL glycerol

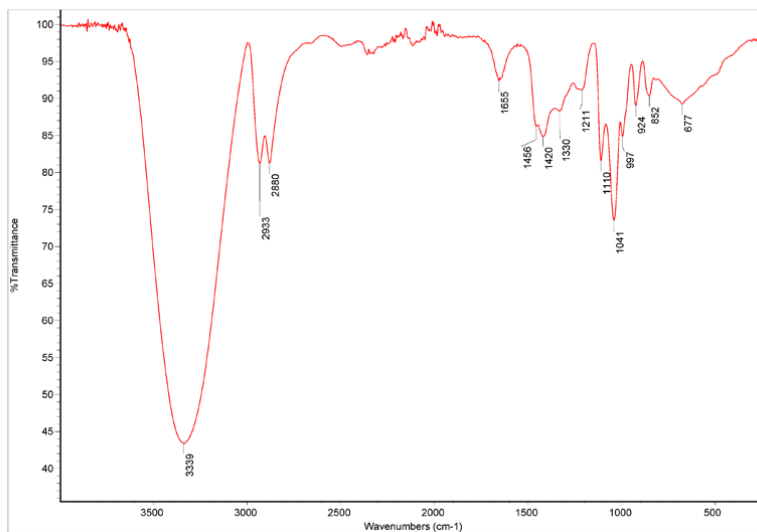

**Fig. S2** DRIFTS spectrum of glycerol

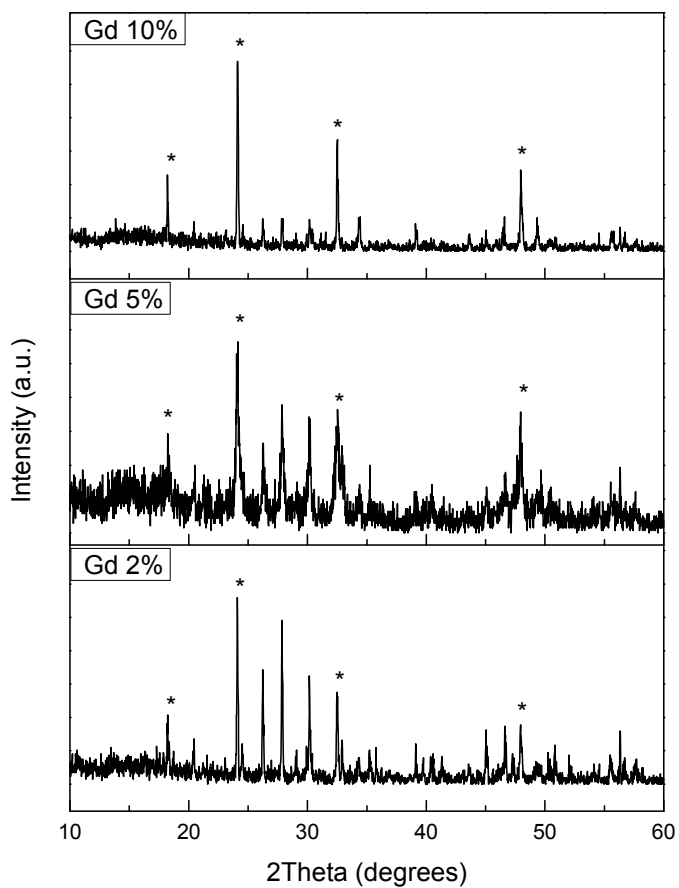

**Fig. S3** XRD patterns of Eu 12.5% doped LaVO<sub>4</sub> with different percentages of Gd<sup>3+</sup> co-doping (2, 5 and 10%). Peaks marked with a star are characteristic peaks of the tetragonal LaVO<sub>4</sub> phase. All other peaks can be assigned to the monoclinic LaVO<sub>4</sub> phase.

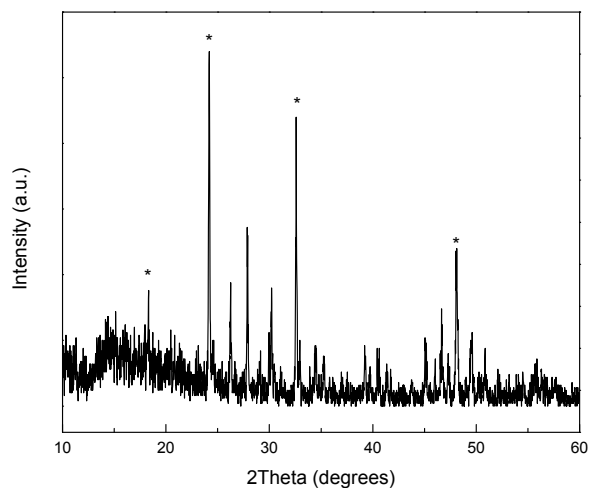

**Fig. S4** XRD pattern of Eu 12.5% doped  $\text{LaVO}_4$  with 10%  $\text{Y}^{3+}$  co-doping. Peaks marked with a star are characteristic peaks of the tetragonal  $\text{LaVO}_4$  phase. All other peaks can be assigned to the monoclinic  $\text{LaVO}_4$  phase.

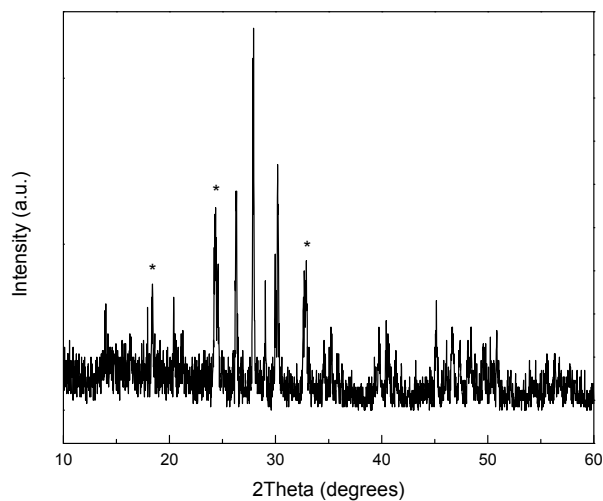

**Fig. S5** XRD pattern of Eu 12.5% doped  $\text{LaVO}_4$  with 10%  $\text{Lu}^{3+}$  co-doping. Peaks marked with a star are characteristic peaks of the tetragonal  $\text{LaVO}_4$  phase. All other peaks can be assigned to the monoclinic  $\text{LaVO}_4$  phase.

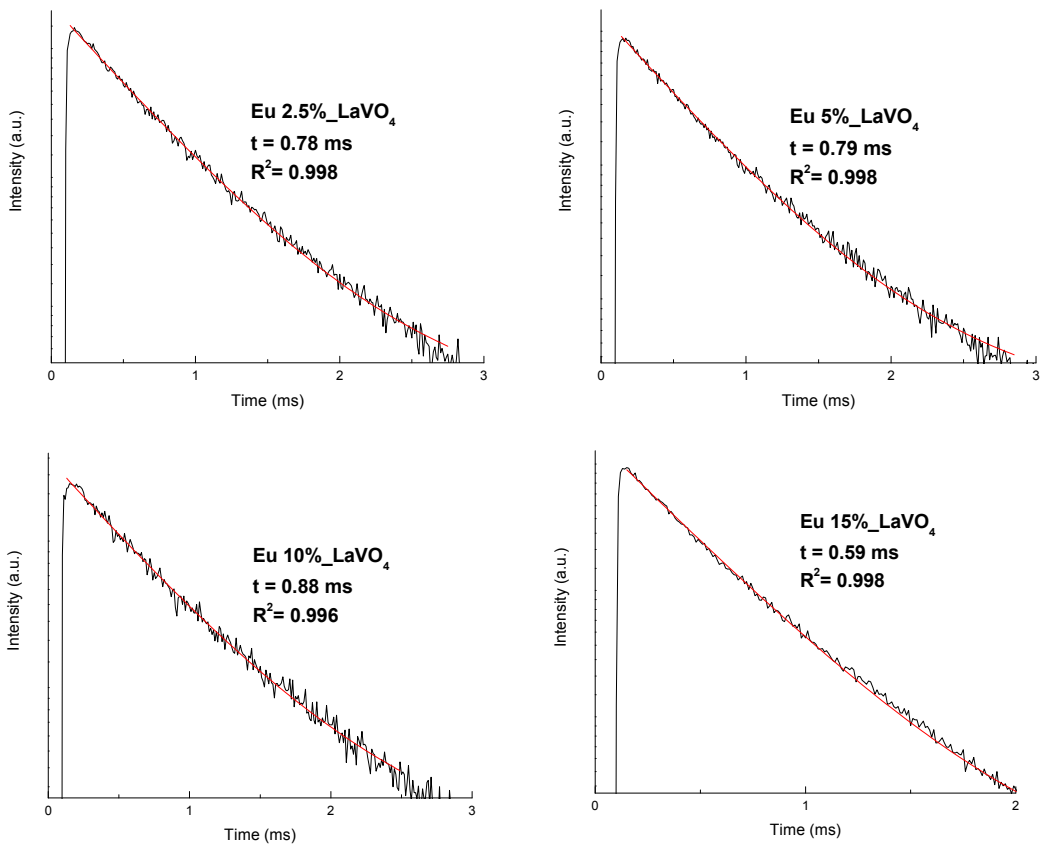

**Fig. S6** Luminescence decay curves of 2.5%, 5%, 10% and 15% Eu<sup>3+</sup> doped LaVO<sub>4</sub> samples.

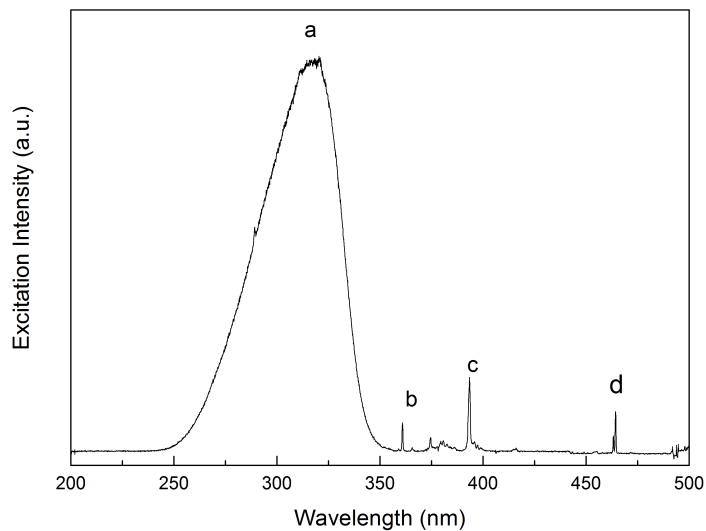

**Fig. S7** Excitation spectrum (uncorrected) of  $\text{Eu}^{3+}$  12.5% doped  $\text{LaVO}_4$  with 10%  $\text{Gd}^{3+}$  co-doping. Peaks a-d are assigned in Table S1.

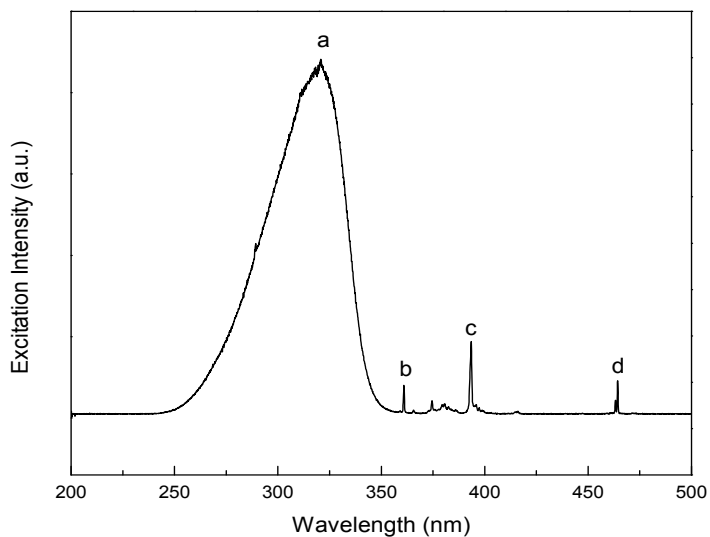

**Fig. S8** Excitation spectrum (uncorrected) of  $\text{Eu}^{3+}$  12.5% doped  $\text{LaVO}_4$  with 10%  $\text{Y}^{3+}$  co-doping. Peaks a-d are assigned in Table S1.

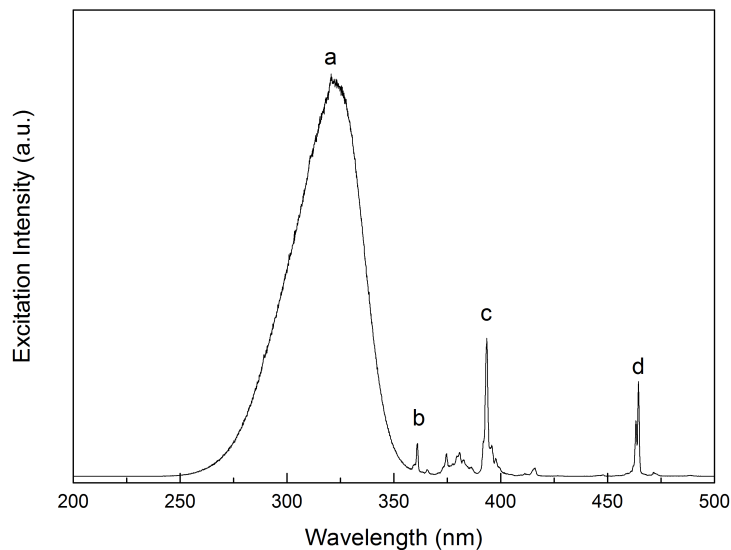

**Fig. S9** Excitation spectrum (uncorrected) of  $\text{Eu}^{3+}$  12.5% doped  $\text{LaVO}_4$  with 10%  $\text{Lu}^{3+}$  co-doping. Peaks a-d are assigned in Table S1.

**Table S1** Assignment of peaks presented in Fig. S8-S10

| Peak | Wavelength (nm) | Transition                             |
|------|-----------------|----------------------------------------|
| a    | 316             | V-O CTB                                |
| b    | 361             | $^5\text{D}_4 \leftarrow ^7\text{F}_0$ |
| c    | 394             | $^5\text{L}_6 \leftarrow ^7\text{F}_0$ |
| d    | 464             | $^5\text{D}_2 \leftarrow ^7\text{F}_0$ |

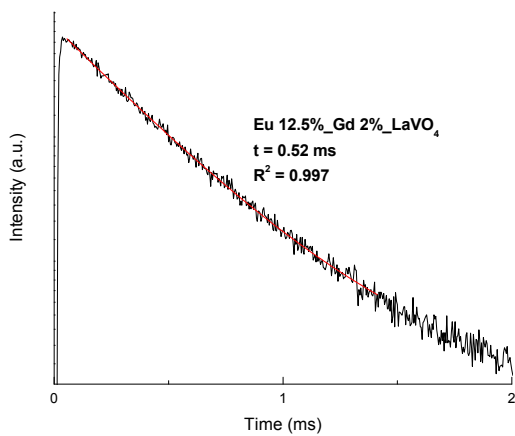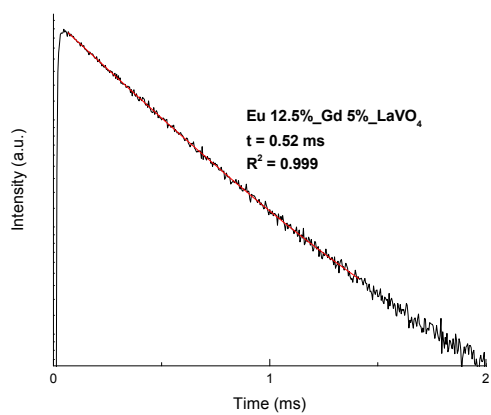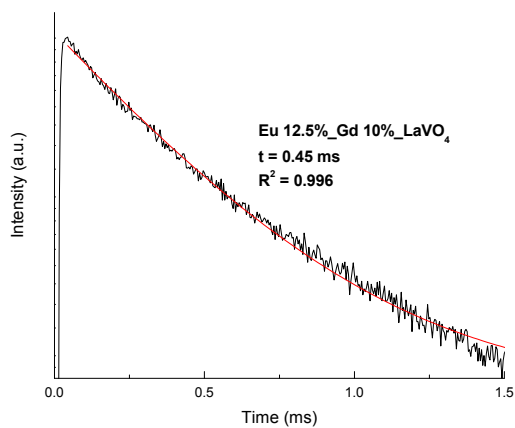

**Fig. S10** Decay curves of 12.5%Eu:LaVO<sub>4</sub> nanoparticles doped with 2, 5 and 10% Gd<sup>3+</sup> ions.



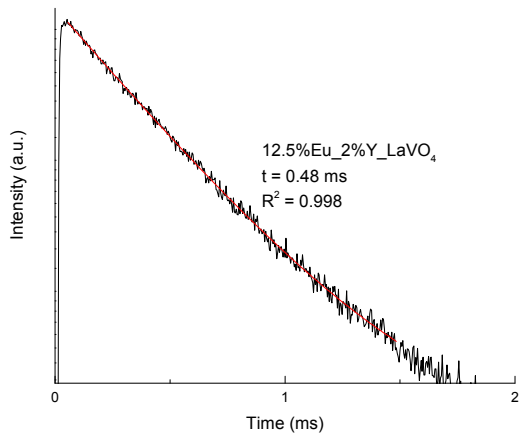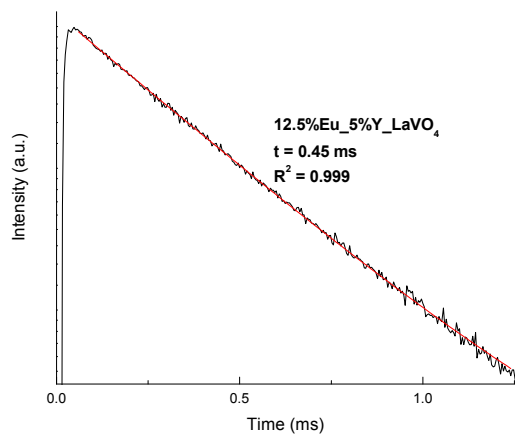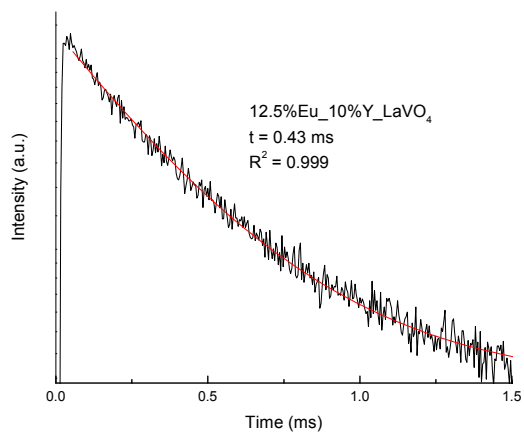

**Fig. S11** Decay curves of 12.5%Eu:LaVO<sub>4</sub> nanoparticles doped with 2, 5 and 10% Y<sup>3+</sup> ions.

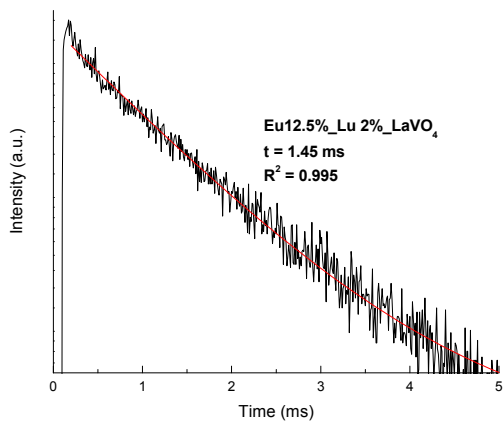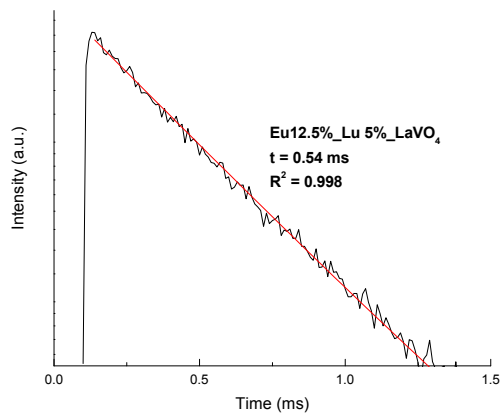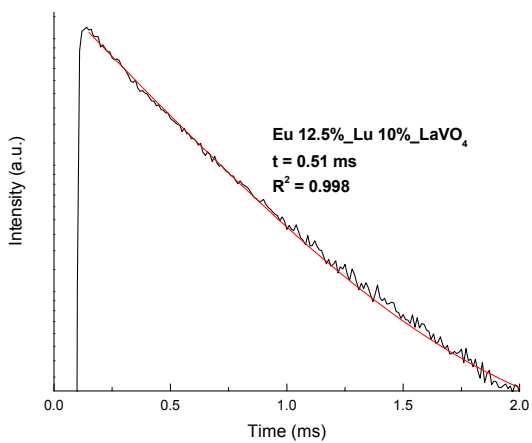

**Fig. S12** Decay curves of 12.5%Eu:LaVO<sub>4</sub> nanoparticles doped with 2, 5 and 10% Lu<sup>3+</sup> ions.

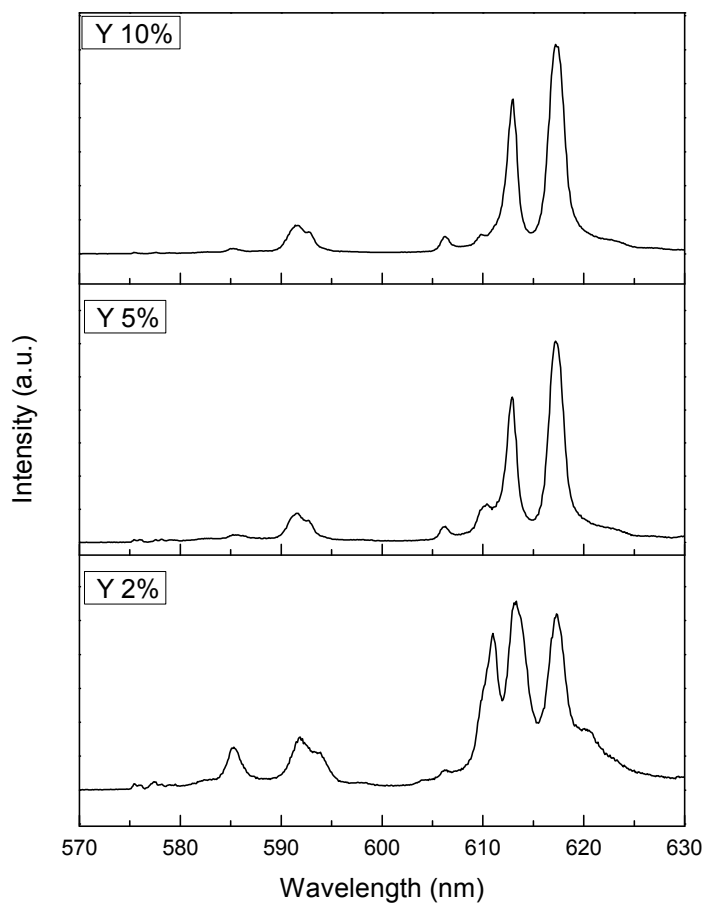

**Fig. S13** High-resolution emission spectra of the 12.5%Eu:LaVO<sub>4</sub> materials with different Y<sup>3+</sup> co-doping percentages.

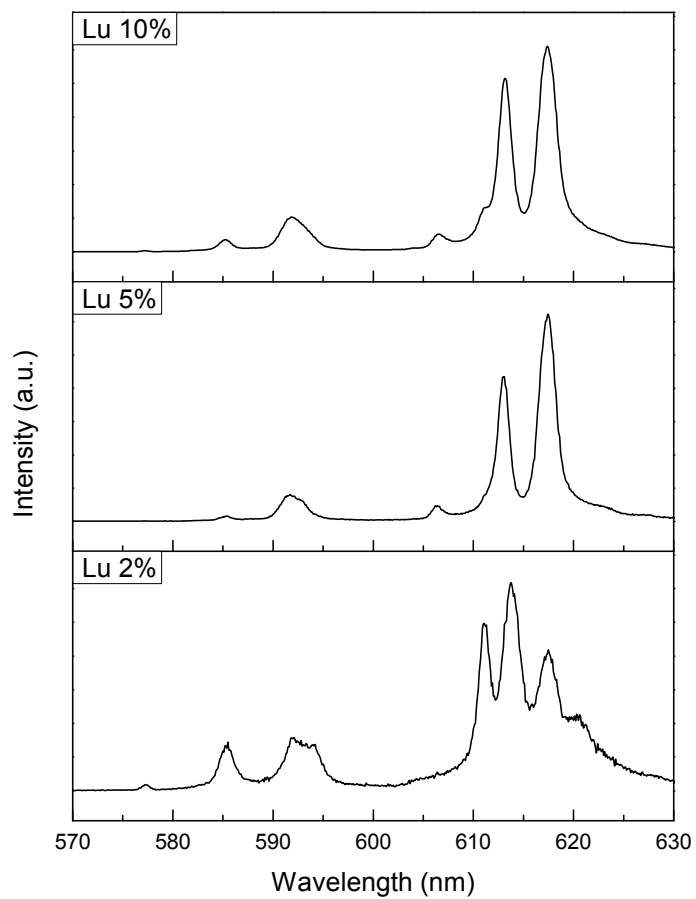

**Fig. S14** High-resolution emission spectra of the 12.5%Eu:LaVO<sub>4</sub> materials with different Lu<sup>3+</sup> co-doping percentages.

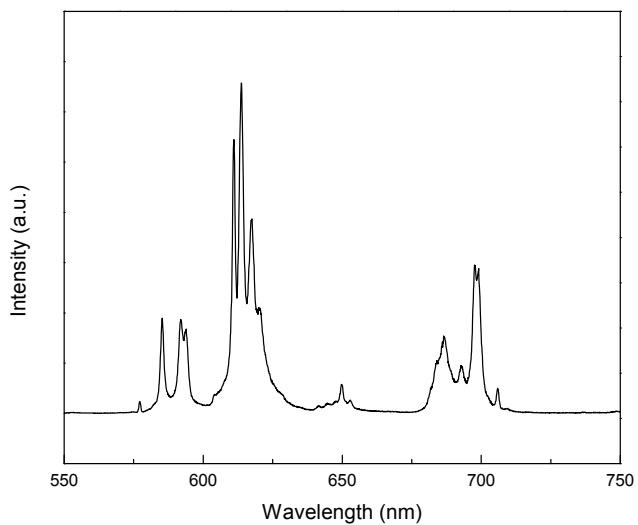

**Fig. S15** Emission spectrum of 12.5%Eu:LaVO<sub>4</sub> nanoparticles suspended in water.

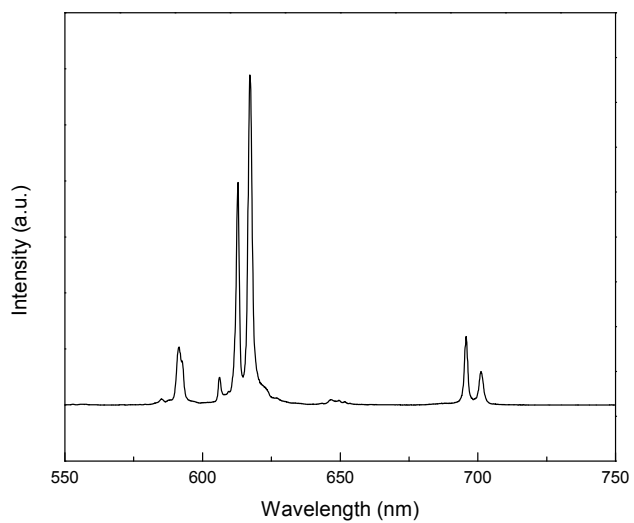

**Fig. S16** Emission spectrum of 12.5%Eu\_10%Gd:LaVO<sub>4</sub> nanoparticles suspended in water.

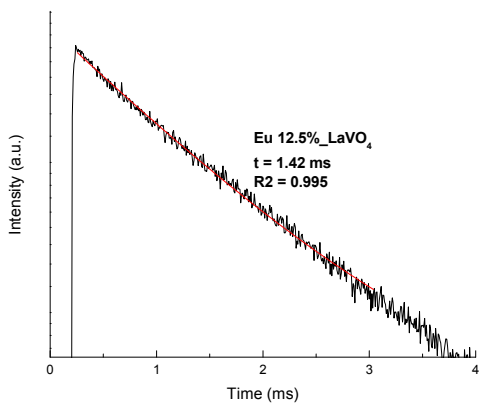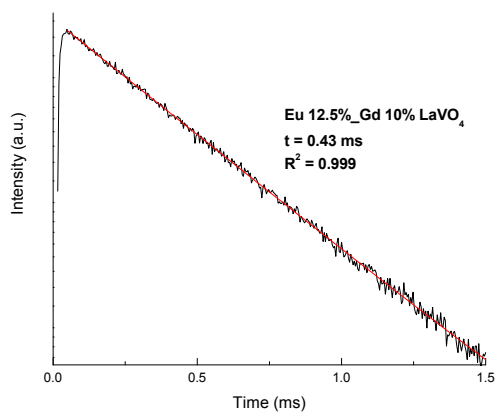

**Fig. S17** Decay graphs of samples measured as colloidal suspensions.
